# Supplementary material for: Evolutionary history of zoogeographical regions surrounding the Tibetan Plateau
Source: PubMed Central journal article supplement (PMC7395132; doi:10.1038/s42003-020-01154-2), 2020-07-31
Supplement: 42003_2020_1154_MOESM5_ESM.pdf [file 42003_2020_1154_MOESM5_ESM.pdf]

## **Description of Additional Supplementary Files**

**Supplementary Data 1** Checklist and distribution of extant terrestrial vertebrates

**Supplementary Data 2** Checklist and distribution of extinct mammal genera

**Supplementary Data 3** Optimal cluster number for each time interval
